# Supplementary material for: Common and distinct structural features of Salmonella injectisome and flagellar basal body
Source: PubMed Central journal article supplement — Sci Rep. 2013 Nov 28;3:3369. doi: 10.1038/srep03369 (PMC3842551; doi:10.1038/srep03369), 2013-11-28
Supplement: srep03369-s1.pdf [file srep03369-s1.pdf]

Supplementary Information

**Common and distinct structural features of *Salmonella* injectisome and flagellar basal body**

**Akihiro Kawamoto<sup>1,2</sup>, Yusuke V. Morimoto<sup>1,2</sup>, Tomoko Miyata<sup>1</sup>, Tohru Minamino<sup>1</sup>, Kelly T. Hughes<sup>3</sup>, Takayuki Kato<sup>1</sup> & Keiichi Namba<sup>1,2\*</sup>**

<sup>1</sup>Graduate School of Frontier Biosciences, Osaka University, 1-3 Yamadaoka, Suita, Osaka 565-0871, Japan.

<sup>2</sup>Riken Quantitative Biology Center, 1-3 Yamadaoka, Suita, Osaka 565-0871, Japan.

<sup>3</sup>Department of Biology, University of Utah, Salt Lake City, UT, USA.

\*Correspondence and requests for materials should be addressed to  
K.N. (keiichi@fbs.osaka-u.ac.jp)

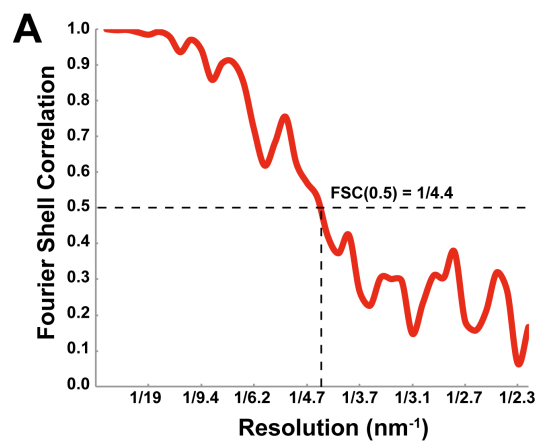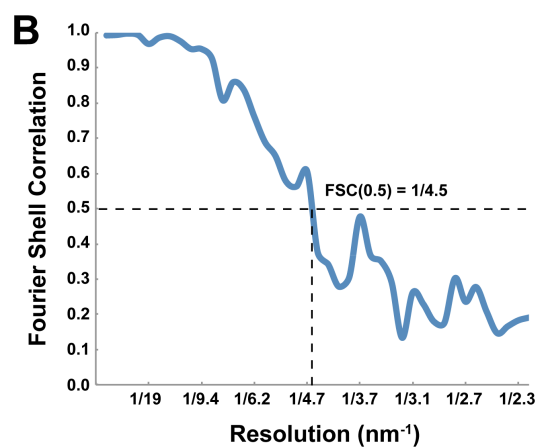

**Supplementary Fig. 1.** The resolution of 3D image reconstructions after subtomogram average. The resolution was estimated by the Fourier shell correlation at 0.5, and it was 4.4 nm for NC (A) and 4.5 nm for HBB (B).

**Supplementary Table 1.** Collection of T3SS homologs of the flagellum and injectisome from *Salmonella*, *Shigella*, *Yersinia* and enterohemorrhagic *E. coli* (2).

| function            | flagellar T3SS                               | nonflagellar T3SS                            |                                            |                                            | function       |                                             |                                         |
|---------------------|----------------------------------------------|----------------------------------------------|--------------------------------------------|--------------------------------------------|----------------|---------------------------------------------|-----------------------------------------|
|                     | <i>Salmonella</i><br>protein<br>(amino acid) | <i>Salmonella</i><br>protein<br>(amino acid) | <i>Shigella</i><br>protein<br>(amino acid) | <i>Yersinia</i><br>protein<br>(amino acid) |                | <i>E. coli</i> *<br>protein<br>(amino acid) |                                         |
| hook                |                                              | SipD<br>(343)                                | IpaD<br>(332)                              | LcrV<br>(324)                              | EspA<br>(192)  | needle tip                                  |                                         |
|                     |                                              | FlgK<br>(553)                                | PrgI<br>(80)                               | MxiH<br>(83)                               | YscF<br>(87)   | EscF<br>(73)                                | needle                                  |
|                     |                                              |                                              | InvG<br>(562)                              | MxiD<br>(566)                              | YscC<br>(607)  | EscC<br>(512)                               | outer membrane ring                     |
|                     |                                              |                                              | PrgJ<br>(101)                              | MxiI<br>(97)                               | YscI<br>(115)  | EscI<br>(142)                               | inner rod                               |
|                     |                                              |                                              | InvH<br>(147)                              | MxiM<br>(142)                              | YscW<br>(131)  |                                             | assist in secretin<br>insertion into OM |
| MS ring protein     | FliF<br>(560)                                | PrgK<br>(252)                                | MxiJ<br>(241)                              | YscJ<br>(244)                              | EscJ<br>(190)  | inner membrane ring                         |                                         |
| C ring protein      | FliG<br>(331)                                | PrgH<br>(392)                                | MxiG<br>(371)                              | YscD<br>(418)                              | EscD<br>(406)  | inner membrane ring                         |                                         |
| export apparatus    | FliO<br>(125)                                | -                                            | -                                          | -                                          | -              |                                             |                                         |
| export apparatus    | FliP<br>(245)                                | SpaP<br>(224)                                | Spa24<br>(216)                             | YscR<br>(217)                              | EscR<br>(217)  | export apparatus                            |                                         |
| export apparatus    | FliQ<br>(245)                                | SpaQ<br>(86)                                 | Spa9<br>(86)                               | YscS<br>(88)                               | EscS<br>(89)   | export apparatus                            |                                         |
| export apparatus    | FliR<br>(264)                                | SpaR<br>(263)                                | Spa29<br>(256)                             | YscT<br>(261)                              | EscT<br>(258)  | export apparatus                            |                                         |
| export apparatus    | FlhA<br>(692)                                | InvA<br>(685)                                | MxiA<br>(686)                              | YscV<br>(704)                              | EscV<br>(675)  | export apparatus                            |                                         |
| export apparatus    | FlhB<br>(383)                                | SpaS<br>(356)                                | Spa40<br>(342)                             | YscU<br>(354)                              | EscU<br>(345)  | export apparatus                            |                                         |
| C ring protein      | FliM<br>(334)                                | SpaO<br>(303)                                | Spa33<br>(293)                             | YscQ<br>(307)                              | EscQ<br>(305)  | sorting platform                            |                                         |
| export apparatus    | FliH<br>(235)                                | OrgA<br>(199)                                | MxiK<br>(172)                              | YscK<br>(209)                              | Orf4<br>(109)  | sorting platform                            |                                         |
|                     |                                              | OrgB<br>(226)                                | MxiN<br>(226)                              | YscL<br>(223)                              | EscL<br>(204)  | sorting platform                            |                                         |
| ATPase              | FliI<br>(456)                                | InvC<br>(431)                                | Spa47<br>(430)                             | YscN<br>(439)                              | EscN<br>(446)  | ATPase                                      |                                         |
| export apparatus    | FliJ<br>(147)                                | InvI<br>(147)                                | Spa13<br>(112)                             | YscO<br>(154)                              |                | ?                                           |                                         |
|                     |                                              | InvE<br>(372)                                | MxiC<br>(355)                              | YopN<br>(293)                              | SepL<br>(351)  | regulator translocation                     |                                         |
| hook length control | FliK<br>(405)                                | InvJ<br>(336)                                | Spa32<br>(292)                             | YscP<br>(453)                              | Orf16<br>(138) | regulator                                   |                                         |
|                     |                                              | OrgC<br>(150)                                | MxiL<br>(135)                              |                                            |                | ?                                           |                                         |

\**E. coli* is EHEC O157

**Supplementary Table 2.** Image processing statistics of subtomogram averaging.

| Strain/plasmid  | Relevant properties | sample          | Tilt-series showing<br>NC or HBB | Extracted<br>particles | Contributed to<br>averaging structure | Pixel size<br>(nm) | defocus<br>( $\mu\text{m}$ ) | Resolution<br>(FSC 0.5) (nm) |
|-----------------|---------------------|-----------------|----------------------------------|------------------------|---------------------------------------|--------------------|------------------------------|------------------------------|
| SJW1103/pYVM031 | Minicell wild-type  | Needle complex  | 52                               | 142                    | 75                                    | 1.1                | -4 ~ -7                      | 4.4                          |
|                 |                     | Hook basal body | 90                               | 105                    | 48                                    |                    |                              | 4.5                          |

**Supplementary Movie 1.** *Salmonella* mini-cells actively swimming in the M9 medium nearly at the same speed as the cells of normal size.
